# Supplementary material for: Aqueous-Based Synthesis of Photocatalytic Copper Sulfide Using Sulfur Waste as Sulfurizing Agent
Source: MDPI journal article supplement (doi:10.3390/ma15155253), 2022-07-29
Supplement: s1 [file s1]

# Aqueous – based synthesis of photocatalytic copper sulfide using sulfur waste as sulfurizing agent

Gabriele Sarapajevaite <sup>1,2, \*</sup>, Davide Morselli <sup>2,3</sup> and Kestutis Baltakys <sup>1</sup>

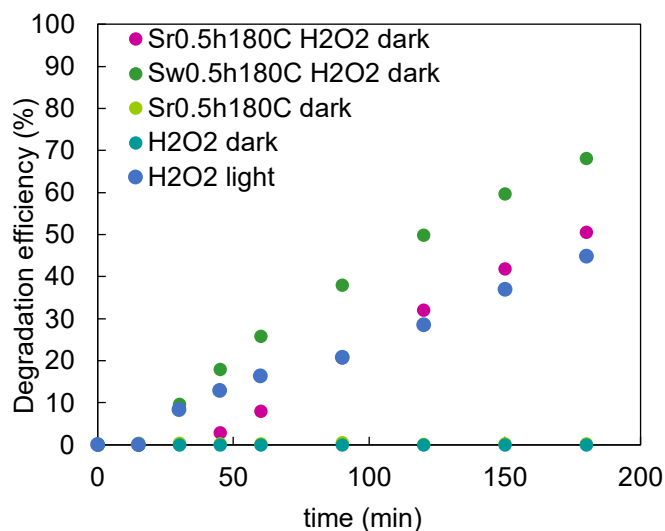

**Figure S1.** Photocatalytic degradation efficiency of comparison tests with photocatalyst and H<sub>2</sub>O<sub>2</sub> in the dark, photocatalyst in the dark, H<sub>2</sub>O<sub>2</sub> in the dark and H<sub>2</sub>O<sub>2</sub> in the light

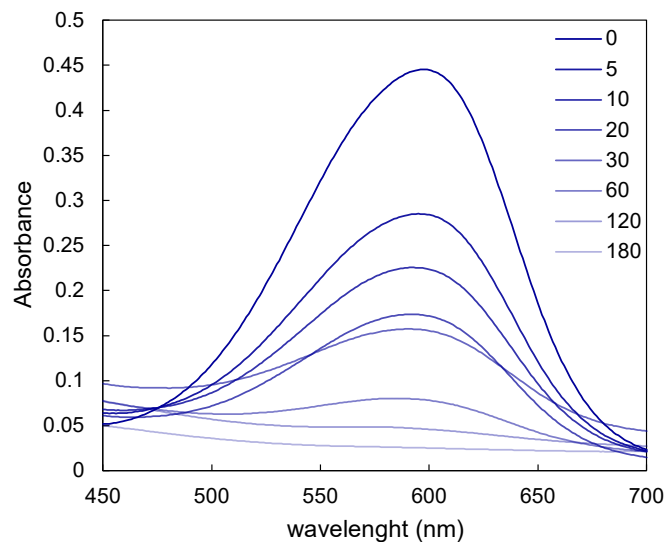

**Figure S2.** The representative peak of methylene blue spectra during photodegradation for sample Sr0.5h180C
